# Supplementary material for: Association Between Chronic Kidney Disease and Rates of Transfusion and Progression to End‐Stage Renal Disease in Patients Undergoing Transradial Versus Transfemoral Cardiac Catheterization—An Analysis From the Veterans Affairs Clinical Assessment Reporting and Tracking (CART) Program
Source: PubMed Central journal article supplement — J Am Heart Assoc. 2017 Apr 18;6(4):e004819. doi: 10.1161/JAHA.116.004819 (PMC5532998; doi:10.1161/jaha.116.004819), 2017-04-18
Supplement: JAH3-6-e004819-s001.pdf [file JAH3-6-e004819-s001.pdf]

# **SUPPLEMENTAL MATERIAL**

**Table S1.** Rates of Transradial versus Transfemoral Access by degree of renal dysfunction

| GFR (ml/min) | Total patients | TR patients | TF patients | % TR  | % TF  |
|--------------|----------------|-------------|-------------|-------|-------|
| 45-59        | 35207          | 5315        | 29892       | 15.1% | 84.9% |
| 30-44        | 10976          | 1485        | 9491        | 13.5% | 86.5% |
| 15-29        | 1972           | 232         | 1740        | 11.8% | 88.2% |

Abbreviations: GFR, glomerular filtration rate; TF, transfemoral; TR, transradial

**Table S2.** After adjustment for contrast use and excluding patients undergoing same-day PCI

| Outcome        | Total N for Model | Comparison   | Adjusted* |          |          |         |
|----------------|-------------------|--------------|-----------|----------|----------|---------|
|                |                   |              | HR        | Lower CL | Upper CL | P-value |
| ESRD           |                   | No CKD       | 1.01      | 0.543    | 1.876    | 0.977   |
|                |                   | 45-59        | 1.46      | 0.729    | 2.906    | 0.287   |
|                |                   | 30-44        | 0.45      | 0.156    | 1.274    | 0.131   |
|                |                   | 15-29        | 0.59      | 0.23     | 1.533    | 0.281   |
|                | 47412             | All patients | 0.75      | 0.517    | 1.08     | 0.122   |
| Major Bleeding |                   | No CKD       | 0.58      | 0.392    | 0.868    | 0.008   |
|                |                   | 45-59        | 0.57      | 0.281    | 1.174    | 0.128   |
|                |                   | 30-44        | 0.65      | 0.312    | 1.365    | 0.257   |
|                |                   | 15-29        | 1.01      | 0.27     | 3.743    | 0.994   |
|                | 47412             | All patients | 0.6       | 0.416    | 0.865    | 0.006   |

Abbreviations: CKD, chronic kidney disease; CL, confidence limit; ESRD, end-stage renal disease

**Table S3.** After excluding sites (n=28) with <5% transradial use

| Outcome        | Total N for Model | Comparison   | Adjusted |          |          |         |
|----------------|-------------------|--------------|----------|----------|----------|---------|
|                |                   |              | HR       | Lower CL | Upper CL | P-value |
| ESRD           |                   | No CKD       | 0.93     | 0.712    | 1.223    | 0.616   |
|                |                   | 45-59        | 1.1      | 0.796    | 1.512    | 0.57    |
|                |                   | 30-44        | 0.85     | 0.629    | 1.143    | 0.278   |
|                |                   | 15-29        | 0.72     | 0.532    | 0.985    | 0.04    |
|                | 161881            | All patients | 0.84     | 0.706    | 1        | 0.05    |
| Major Bleeding |                   | No CKD       | 0.97     | 0.712    | 1.312    | 0.826   |
|                |                   | 45-59        | 0.9      | 0.661    | 1.235    | 0.526   |
|                |                   | 30-44        | 0.65     | 0.447    | 0.941    | 0.023   |
|                |                   | 15-29        | 0.4      | 0.175    | 0.899    | 0.027   |
|                | 161881            | All patients | 0.88     | 0.69     | 1.122    | 0.303   |

Abbreviations: CKD, chronic kidney disease; CL, confidence limit; ESRD, end-stage renal disease

**Table S4.** Excluding patients with prior CABG

| Outcome        | Total N for Model | Comparison   | Adjusted |          |          |         |
|----------------|-------------------|--------------|----------|----------|----------|---------|
|                |                   |              | HR       | Lower CL | Upper CL | P-value |
| ESRD           |                   | No CKD       | 0.92     | 0.707    | 1.189    | 0.513   |
|                |                   | 45-59        | 1.03     | 0.733    | 1.438    | 0.878   |
|                |                   | 30-44        | 0.79     | 0.566    | 1.099    | 0.161   |
|                |                   | 15-29        | 0.68     | 0.497    | 0.939    | 0.019   |
|                |                   | All patients | 0.83     | 0.692    | 1.001    | 0.052   |
| Major Bleeding | 179123            | No CKD       | 0.95     | 0.713    | 1.276    | 0.75    |
|                |                   | 45-59        | 0.93     | 0.685    | 1.257    | 0.629   |
|                |                   | 30-44        | 0.73     | 0.5      | 1.073    | 0.11    |
|                |                   | 15-29        | 0.33     | 0.123    | 0.855    | 0.023   |
|                |                   | All patients | 0.89     | 0.708    | 1.118    | 0.317   |

Abbreviations: CABG, coronary artery bypass grafting; CKD, chronic kidney disease; CL, confidence limit; ESRD, end-stage renal disease
